# Supplementary material for: Body composition data show that high BMI centiles overdiagnose obesity in children aged under 6 years
Source: PubMed Central journal article supplement (PMC9257461; doi:10.1093/ajcn/nqab421), 2021-12-30
Supplement: nqab421_supplemental_file.pdf [file nqab421_supplemental_file.pdf]

Supplementary Table 1. Body composition data sources.

| Study (citation)                    | Period    | Age range  | Location  | % male | Method used      | Number of subjects | Number of measures | Number of measures per subject |
|-------------------------------------|-----------|------------|-----------|--------|------------------|--------------------|--------------------|--------------------------------|
| Infant energy metabolism 1 (16)     | 1987-1988 | 1.5m – 9m  | Cambridge | 37.5   | D <sub>2</sub> O | 51                 | 157                | 1-4 (median 3)                 |
| Infant energy metabolism 2 (17, 18) | 1992-1995 | 3m – 3y    | Cambridge | 50.0   | D <sub>2</sub> O | 42                 | 58                 | 1-2                            |
| Infant energy metabolism 3 (19, 20) | 1995-1997 | 9m – 2y    | Cambridge | 49.0   | D <sub>2</sub> O | 35                 | 53                 | 1-2                            |
| Infant energy-metabolism 4 (21)     | 2007-2008 | 4 – 6m     | Glasgow   | 50.0   | D <sub>2</sub> O | 28                 | 56                 | 2                              |
| Child energy metabolism (22)        | 1991-1992 | 1.5 – 4.5y | Cambridge | 51.9   | D <sub>2</sub> O | 77                 | 77                 | 1                              |
| DXA validation study (23)           | 1995-1996 | 5 – 11y    | Cambridge | 51.2   | D <sub>2</sub> O | 41                 | 41                 | 1                              |
| Young 4C methods study (24)         | 2001-2002 | 4 – 7y     | Cambridge | 50.0   | 4C               | 20                 | 20                 | 1                              |
| DXA calibration study (15)          | 2000      | 8 – 9y     | Bristol   | 50.0   | D <sub>2</sub> O | 50                 | 50                 | 1                              |
| Older 4C methods study (14)         | 1996-1997 | 8 – 12y    | Cambridge | 53.3   | 4C               | 30                 | 30                 | 1                              |
| Reference child (12)                | 2001-2016 | 4 – 20 y   | London    | 49.4   | 4C               | 509                | 755                | 1-5 (median 1)                 |
| BIA validation children (25)        | 1995-1996 | 5 – 11y    | London    | 47.5   | D <sub>2</sub> O | 598                | 598                | 1                              |
| BIA calibration adolescents (26)    | 2008-2009 | 11 – 15y   | London    | 47.1   | D <sub>2</sub> O | 380                | 380                | 1                              |
| Obesity clinics (27, 28)            | 2003-2008 | 6 – 19y    | London    | 38.0   | 4C               | 92                 | 92                 | 1                              |

Age: m – months, y – years; Method: D<sub>2</sub>O – deuterium dilution, 4C – 4-component model

Supplementary Table 2. Linear regression results for Figure 2 by sex and age group.

| Sex            | Age group (years) | Correlation coefficient + 95% CI | Regression coefficient + 95% CI |
|----------------|-------------------|----------------------------------|---------------------------------|
| <b>FMI-LMI</b> |                   |                                  |                                 |
| boys           | 0-<3              | -0.18 (-0.33, -0.03)             | -0.23 (-0.43, -0.03)            |
| girls          | 0-<3              | -0.12 (-0.26, 0.03)              | -0.15 (-0.33, 0.03)             |
| boys           | 3-<6              | -0.09 (-0.32, 0.15)              | -0.08 (-0.30, 0.14)             |
| girls          | 3-<6              | 0.08 (-0.16, 0.31)               | 0.11 (-0.21, 0.43)              |
| boys           | 6-<9              | 0.44 (0.34, 0.54)                | 0.77 (0.57, 0.97)               |
| girls          | 6-<9              | 0.53 (0.44, 0.62)                | 1.03 (0.83, 1.23)               |
| boys           | 9-<12             | 0.5 (0.40, 0.59)                 | 1.03 (0.81, 1.25)               |
| girls          | 9-<12             | 0.61 (0.53, 0.67)                | 1.24 (1.06, 1.42)               |
| boys           | 12-<15            | 0.46 (0.36, 0.55)                | 0.79 (0.59, 0.99)               |
| girls          | 12-<15            | 0.68 (0.60, 0.74)                | 1.21 (1.05, 1.37)               |
| boys           | 15-<20            | 0.42 (0.24, 0.56)                | 0.64 (0.36, 0.92)               |
| girls          | 15-<20            | 0.6 (0.48, 0.70)                 | 1.23 (0.93, 1.53)               |
| <b>FMI-BMI</b> |                   |                                  |                                 |
| boys           | 0-<3              | 0.73 (0.65, 0.80)                | 0.63 (0.53, 0.73)               |
| girls          | 0-<3              | 0.76 (0.70, 0.82)                | 0.64 (0.56, 0.72)               |
| boys           | 3-<6              | 0.65 (0.49, 0.77)                | 0.47 (0.35, 0.59)               |
| girls          | 3-<6              | 0.82 (0.73, 0.89)                | 0.64 (0.54, 0.74)               |
| boys           | 6-<9              | 0.92 (0.90, 0.94)                | 0.68 (0.64, 0.72)               |
| girls          | 6-<9              | 0.95 (0.93, 0.96)                | 0.70 (0.68, 0.72)               |
| boys           | 9-<12             | 0.95 (0.93, 0.96)                | 0.72 (0.70, 0.74)               |
| girls          | 9-<12             | 0.96 (0.95, 0.97)                | 0.71 (0.69, 0.73)               |
| boys           | 12-<15            | 0.93 (0.91, 0.94)                | 0.68 (0.64, 0.72)               |
| girls          | 12-<15            | 0.96 (0.95, 0.97)                | 0.67 (0.65, 0.69)               |
| boys           | 15-<20            | 0.91 (0.86, 0.94)                | 0.64 (0.58, 0.70)               |
| girls          | 15-<20            | 0.96 (0.94, 0.97)                | 0.71 (0.67, 0.75)               |
| <b>LMI-BMI</b> |                   |                                  |                                 |
| boys           | 0-<3              | 0.54 (0.41, 0.64)                | 0.37 (0.27, 0.47)               |
| girls          | 0-<3              | 0.55 (0.44, 0.64)                | 0.36 (0.28, 0.44)               |
| boys           | 3-<6              | 0.7 (0.55, 0.80)                 | 0.53 (0.41, 0.65)               |
| girls          | 3-<6              | 0.63 (0.47, 0.76)                | 0.36 (0.26, 0.46)               |
| boys           | 6-<9              | 0.75 (0.69, 0.80)                | 0.32 (0.28, 0.36)               |
| girls          | 6-<9              | 0.78 (0.72, 0.82)                | 0.30 (0.28, 0.32)               |
| boys           | 9-<12             | 0.75 (0.69, 0.80)                | 0.28 (0.26, 0.30)               |
| girls          | 9-<12             | 0.81 (0.77, 0.85)                | 0.29 (0.27, 0.31)               |
| boys           | 12-<15            | 0.76 (0.70, 0.81)                | 0.32 (0.28, 0.36)               |
| girls          | 12-<15            | 0.86 (0.82, 0.89)                | 0.33 (0.31, 0.35)               |
| boys           | 15-<20            | 0.76 (0.67, 0.83)                | 0.36 (0.30, 0.42)               |
| girls          | 15-<20            | 0.81 (0.74, 0.86)                | 0.29 (0.25, 0.33)               |

Supplementary Figure 1: Flow diagram

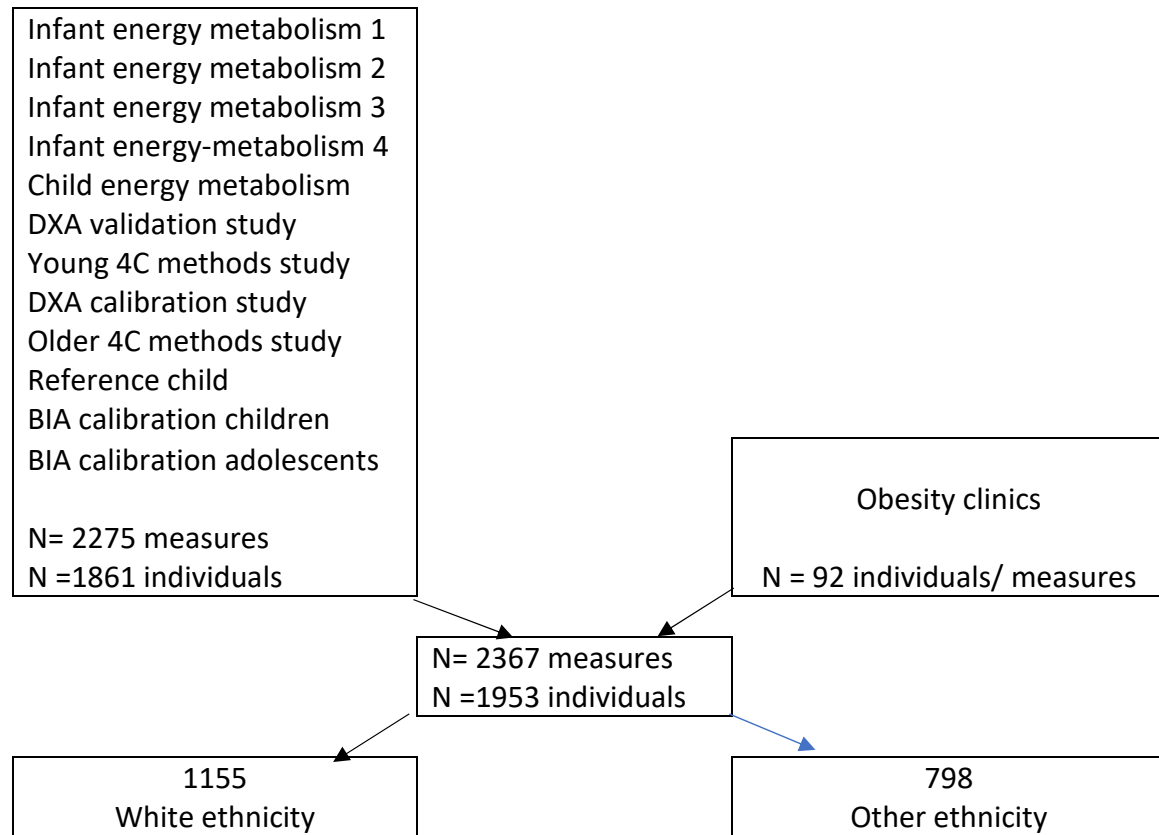

**Supplementary Figure 2:** Scatterplots of A) FMI against LMI, B) FMI against BMI and C) LMI against BMI by age group, ethnicity and sex, each with Pearson correlation coefficient  $r$ , sample size  $n$ , cubic P-spline regression curve and 95% confidence band. Points are color-coded by BMI centile group: yellow <25th, orange 25<50th, mauve 50<75th, purple 75<91st, dark purple 91<98th, navy blue >98th: obesity clinic patients shown as '+'.

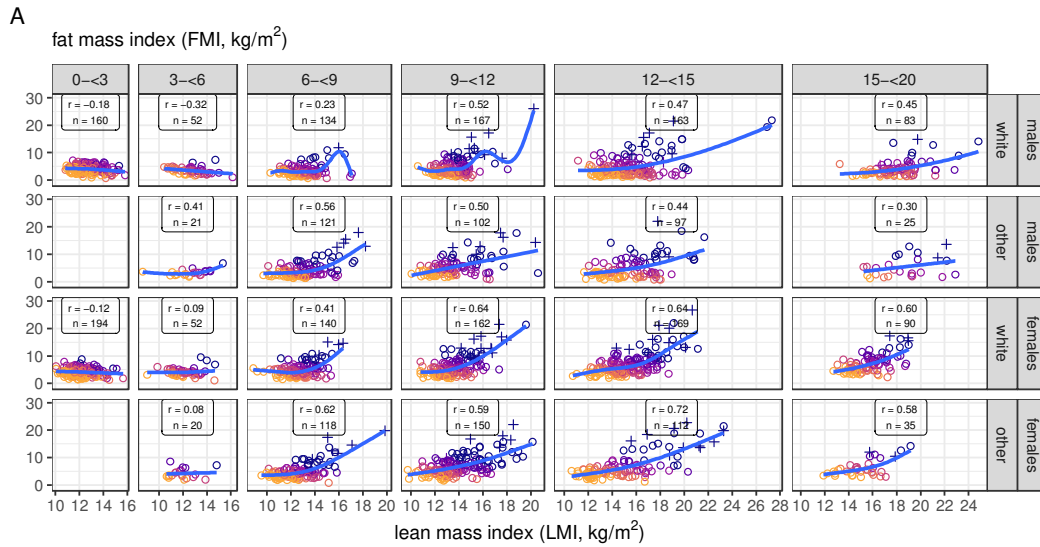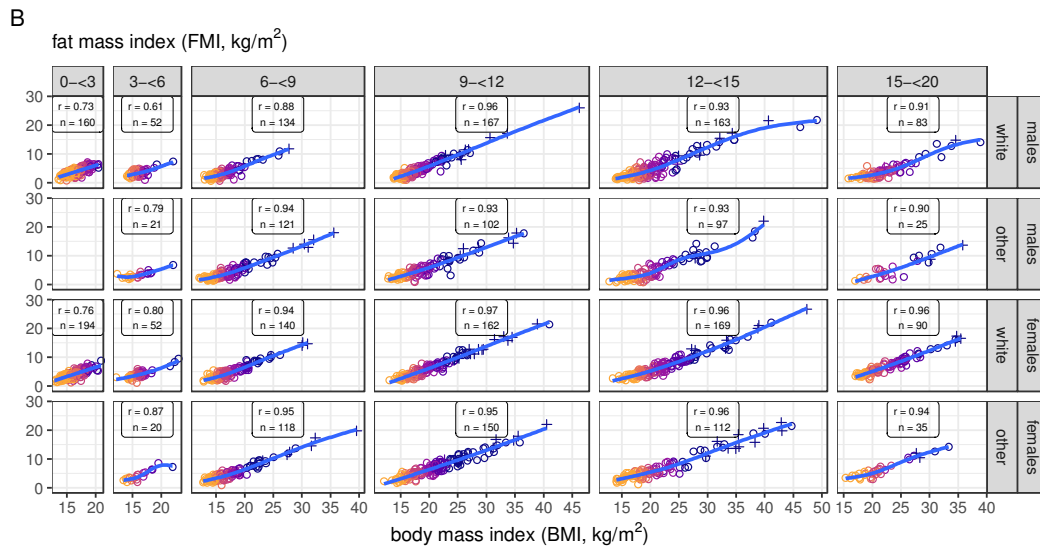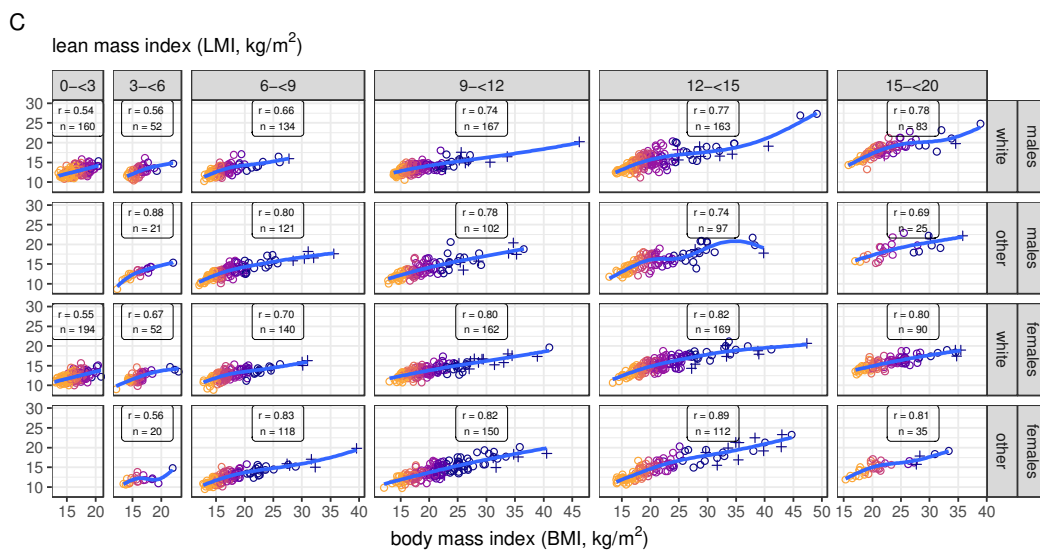

BMI centile ● 0-<25 ● 25-<50 ● 50-<75 ● 75-<91 ● 91-<98 ● 98-<100 source ○ sample + clinic
